# Supplementary material
Source: HighWire-hosted journal article supplement (doi:10.1101/rna.063503.117)
Supplement: Supplemental_Table_S1.xlsx [file Supplemental_Table_S1.xlsx]

## Sheet: Table S1
V	NT	RNA modification			Human disease linked	Phylogenetic distribution			RNA subtype				Mapping technology
		Short Nomenclature	New Nomenclature	Full Name		Human Enzyme	Yeast enzyme	Bact enzyme	tRNA	mRNA	rRNA	small ncRNA
1	U	m1acp3Y	1309U	1-methyl-3-(3-amino-3-carboxypropyl)pseudouridine	Bowen-Conradi Syndrome (EMG1)[1, 2]	ACA13 EMG1 NEP1	snR35 (Y) EMG1/NEP1 (m1)						RT Mismatch signature predicted ¹
2	U	m1Y	19U	1-methylpseudouridine	Bowen-Conradi Syndrome (EMG1)[1, 2]	EMG1 NEP1	NEP1 (rRNA)
3	U	ges2U	21U	2-geranylthiouridine				MnmH SelU	N34
4	U	se2U	20U	2-selenouridine				2-selenouridine synthase	N34
5	U	s2Um	02U	2-thio-2′-O-methyluridine	Acute infantile liver failure (TRMU)[3][4] Cancer (TRMU)[5] Deafness (TRMU)[6] MERRF (tRNA/TRMU)[7, 8] MELAS syndrome (tRNA/TRMU)[9][7][10] Mitochondrial associated deafness (TRMU)[6] Mitochondrial Infantile Liver Disease (TRMU)[11] Mitochondrial respiratory chain defects (TRMU)[12] MLASA (TRMU)[8]	TRMU
6	U	s2U	2U	2-thiouridine	Acute infantile liver failure (TRMU)[3][4] Cancer (TRMU)[5] Deafness (TRMU)[6] MERRF (tRNA/TRMU)[7, 8] MELAS syndrome (tRNA/TRMU)[9][7][10] Mitochondrial associated deafness (TRMU)[6] Mitochondrial Infantile Liver Disease (TRMU)[11] Mitochondrial respiratory chain defects (TRMU)[12] MLASA (TRMU)[8]	TRMU	MTU1 NCS2 NCS6	MnmA TusA TusBCD TusE	N34
7	U	Ym	09U	2′-O-methylpseudouridine								snoRNA
8	U	Um	0U	2′-O-methyluridine	Non-syndromic X-linked mental retardation (FTSJ1)[13]	FTSJ1 (tRNA) FTSJ2 FTSJ3	TRM7 (tRNA)		N32 N34			snRNA	RiboMethSeq
9	U	m3Um	03U	3,2′-O-dimethyluridine									RT Mismatch signature predicted ³
10	U	acp3D	308U	3-(3-amino-3-carboxypropyl)-5,6-dihydrouridine					N47				RT Mismatch signature predicted ³
11	U	acp3Y	309U	3-(3-amino-3-carboxypropyl)pseudouridine									RT Mismatch signature predicted ³
12	U	acp3U	30U	3-(3-amino-3-carboxypropyl)uridine									RT Mismatch signature predicted ³
13	U	m3Y	39U	3-methylpseudouridine				RlmH					RT Mismatch signature predicted ¹
14	U	m3U	3U	3-methyluridine			BMT5 (rRNA pos 2634) BMT6 (rRNA pos 2843)	RsmE					RT Mismatch signature predicted ¹
15	U	s4U	74U	4-thiouridine				ThiI	N8				RT Mismatch signature predicted ³
16	U	m5Um	05U	5,2′-O-dimethyluridine
17	U	mchm5Um	0522U	5-(carboxyhydroxymethyl)-2′-O-methyluridine methyl ester
18	U	mchm5U	522U	5-(carboxyhydroxymethyl)uridine methyl ester	Bladder cancer (ALKBH8)[14, 15]	ALKBH8
19	U	inm5s2U	2583U	5-(isopentenylaminomethyl)-2-thiouridine
20	U	inm5Um	0583U	5-(isopentenylaminomethyl)-2′-O-methyluridine
21	U	inm5U	583U	5-(isopentenylaminomethyl)uridine
22	U	nm5ges2U	21510U	5-aminomethyl-2-geranylthiouridine
23	U	nm5se2U	20510U	5-aminomethyl-2-selenouridine				MnmH MnmCD MnmE MnmG
24	U	nm5s2U	2510U	5-aminomethyl-2-thiouridine	Acute infantile liver failure (TRMU)[3][4] Cancer (TRMU)[5] Deafness (TRMU)[6] MERRF (tRNA/TRMU)[7, 8] MELAS syndrome (tRNA/TRMU)[9][7][10] Mitochondrial associated deafness (TRMU)[6] Mitochondrial Infantile Liver Disease (TRMU)[11] Mitochondrial respiratory chain defects (TRMU)[12] MLASA (TRMU)[8]	TRMU	MTU1	MnmCD MnmE MnmG
25	U	nm5U	510U	5-aminomethyluridine				MnmCD MnmE MnmG
26	U	nchm5U	531U	5-carbamoylhydroxymethyluridine	Bladder cancer (ALKBH8)[14, 15]	ALKBH8
27	U	ncm5s2U	253U	5-carbamoylmethyl-2-thiouridine		Cytoplasmic tRNA 2-thiolation protein 1 (IPR000541) (PREDICTED)	NCS2 NCS6
28	U	ncm5Um	053U	5-carbamoylmethyl-2′-O-methyluridine	Non-syndromic X-linked mental retardation (FTSJ1)[13]	FTSJ1 FTSJ3	TRM7
29	U	ncm5U	53U	5-carbamoylmethyluridine	Rolandic Epilepsy (ELP4)[16] Breast cancer (ELP3)[17] Dysautonomia (IKBKAP)[18, 19] Familial dysautonomia (IKBKAP)[20-22] Neuropathy (IKBKAP)[19]	ELP3 ELP4 IKBKAP
30	U	chm5U	520U	5-carboxyhydroxymethyluridine
31	U	cm5s2U	2540U	5-carboxymethyl-2-thiouridine
32	U	cmnm5ges2U	2151U	5-carboxymethylaminomethyl-2-geranylthiouridine				MnmH					RT Mismatch signature predicted ³
33	U	cmnm5se2U	2051U	5-carboxymethylaminomethyl-2-selenouridine				MnmH MnmE MnmG
34	U	cmnm5s2U	251U	5-carboxymethylaminomethyl-2-thiouridine	Acute infantile liver failure (TRMU)[3][4] Cancer (TRMU)[5] Deafness (TRMU)[6] MERRF (tRNA/TRMU)[7, 8] MELAS syndrome (tRNA/TRMU)[9][7][10] Mitochondrial associated deafness (TRMU)[6] Mitochondrial Infantile Liver Disease (TRMU)[11] Mitochondrial respiratory chain defects (TRMU)[12] MLASA (TRMU)[8]	TRMU	MTU1 MSS1 MTO1	MnmA MnmE MnmG
35	U	cmnm5Um	051U	5-carboxymethylaminomethyl-2′-O-methyluridine				TrmL MnmE MnmG
36	U	cmnm5U	51U	5-carboxymethylaminomethyluridine	Hypertrophic cardiomyopathy (MTO1)[23, 24]	Protein MTO1 homolog mitochondrial isoform	MSS1 MTO1	MnmE MnmG
37	U	cm5U	52U	5-carboxymethyluridine
38	U	cnm5U	55U	5-cyanomethyluridine
39	U	ho5U	50U	5-hydroxyuridine
40	U	mcm5s2U	2521U	5-methoxycarbonylmethyl-2-thiouridine	Bladder cancer (ALKBH8)[14, 15] Cancer (CTU1)[17] Breast cancer (ELP3)[17], (CTU) [66] Amyotrophic lateral sclerosis ALS (ELP3)[25] Rolandic Epilepsy (ELP4)[16] Bronchial asthma (IKBKAP)[26] Dysautonomia (IKBKAP)[18, 19] Familial dysautonomia (IKBKAP)[20-22] Neuropathy (IKBKAP)[19] Acute infantile liver failure (TRMU)[3][4] Cancer (TRMU)[5] Deafness (TRMU)[6] MERRF (tRNA/TRMU)[7, 8] MELAS syndrom…	ALKBH8 CTU1 ELP3 (tRNA) ELP4 (tRNA) IKBKAP (tRNA) TRMU	NCS2 NCS6 TRM9						RT Mismatch signature predicted ²
41	U	mcm5Um	0521U	5-methoxycarbonylmethyl-2′-O-methyluridine
42	U	mcm5U	521U	5-methoxycarbonylmethyluridine	Bladder cancer (ALKBH8)[14, 15] Breast cancer (ELP3)[17] Amyotrophic lateral sclerosis ALS (ELP3)[25] Rolandic Epilepsy (ELP4)[16] Bronchial asthma (IKBKAP)[26] Dysautonomia (IKBKAP)[18, 19] Familial dysautonomia (IKBKAP)[20-22] Neuropathy (IKBKAP)[19] Cancer (KIAA1456/TRM9L)[27]	ALKBH8 ELP3 ELP4 IKBKAP KIAA1456/TRM9L	ELP3 ELP4 TRM9 (+TRM112) N34
43	U	mo5U	501U	5-methoxyuridine				CmoB
44	U	m5s2U	25U	5-methyl-2-thiouridine	Acute infantile liver failure (TRMU)[3][4] Cancer (TRMU)[5] Deafness (TRMU)[6] MERRF (tRNA/TRMU)[7, 8] MELAS syndrome (tRNA/TRMU)[9][7][10] Mitochondrial associated deafness (TRMU)[6] Mitochondrial Infantile Liver Disease (TRMU)[11] Mitochondrial respiratory chain defects (TRMU)[12] MLASA (TRMU)[8]	TRMU
45	U	mnm5ges2U	21511U	5-methylaminomethyl-2-geranylthiouridine				MnmH					RT Mismatch signature predicted ³
46	U	mnm5se2U	20511U	5-methylaminomethyl-2-selenouridine	Lactic acidosis (GTPBP3)[28] Non-syndromicdeafness (GTPBP3)[29] Hypertrophic cardiomyopathy (GTPBP3)[28] Mitochondrial respiratory chain defects (GTPBP3)[28] Encephalopathy (GTPBP3)[28]	GTPBP3		MnmCD MnmH
47	U	mnm5s2U	2511U	5-methylaminomethyl-2-thiouridine	Acute infantile liver failure (TRMU)[3] Cancer (TRMU)[5] Deafness (TRMU)[6] MERRF (tRNA/TRMU)[7, 8] MELAS syndrome (tRNA/TRMU)[9][7][10] Mitochondrial associated deafness (TRMU)[6] Mitochondrial Infantile Liver Disease (TRMU)[11] Mitochondrial respiratory chain defects (TRMU)[12] MLASA (TRMU)[8]	TRMU	MTU1	MnmCD MnmD MnmA
48	U	mnm5U	511U	5-methylaminomethyluridine				MnmCD MnmD
49	U	m5D	58U	5-methyldihydrouridine								Chromosomal RNA
50	U	m5U	5U	5-methyluridine	Breast cancer (TRMT2A)[30]	TRMT2A (tRNA N42 N54) TRMT2B1	TRM2 (tRNA)	RlmC RlmCD RlmD RlmFO TrmA TrmFO TrmU54				tmRNA
51	U	tm5s2U	254U	5-taurinomethyl-2-thiouridine	Acute infantile liver failure (TRMU)[3][4] Cancer (TRMU)[5] Deafness (TRMU)[6] MERRF (tRNA/TRMU)[7, 8] MELAS syndrome (tRNA/TRMU)[9][7][10] Mitochondrial associated deafness (TRMU)[6] Mitochondrial Infantile Liver Disease (TRMU)[11] Mitochondrial respiratory chain defects (TRMU)[12] MLASA (TRMU)[8]	TRMU
52	U	tm5U	54U	5-taurinomethyluridine	MELAS (tRNA)[7]	GTPB3
53	U	D	8U	dihydrouridine		DUS1L DUS2 DUS3L DUS4L PP35	DUS1 (tRNA N16 N17) DUS2 (tRNA N20 N21 N22) DUS3 DUS4	DusA DusB DusC				snRNA Chromosomal RNA
54	U	Y	9U	pseudouridine	Dyskeratosis congenital (DKC1)[31-33] Pituitary tumorigenesis (DKC1)[34] Prostate cancer (DKC1)[35] Lactic acidosis (PUS1)[36] Mitochondrial myopathy (PUS1)[36-39] MLASA (PUS1)[36-39] Sideroblastic Anemia (PUS1)[39]	PUS1 PUS3 RPUSD2 PUS7	Pus1 (tRNA N1 N26 N27 N28 N34 N35 N36 N65) Pus2 (tRNA N26 N27) Pus3 (tRNA N38 N39) Pus4 (tRNA N55) Pus6 (tRRA N31) Pus7 (tRNA N13 N35) Pus8 (tRNA N32)					tmRNA snRNA	Pseudo-seq
55	U	U	U	uridine				Cdat8
56	U	cmo5U	502U	uridine 5-oxyacetic acid				CmoB CmoA
57	U	mcmo5U	503U	uridine 5-oxyacetic acid methyl ester
58	U	k2C	21C	2-lysidine				TilS	N34				RT Mismatch signature predicted ³
59	U	s2C	2C	2-thiocytidine				TtcA	N32				RT Mismatch signature predicted ³
60	C	Cm	0C	2′-O-methylcytidine	Non-syndromic X-linked mental retardation (FTSJ1)[13]	FTSJ1 FTSJ2 FTSJ3 CCDC76	NOP1 TRM13 TRM7 (tRNA)	RlmM RsmI TrmJ TrmL aTrm56	N32 N34			snRNA	RiboMethSeq
61	C	m3C	3C	3-methylcytidine	Asthma (METTL2B)[40] Breast cancer (METTL6)[41] Lung Cancer (METTL6)[42]	METTL2B METTL2A METTL8 METTL6	TRM140 (tRNA)		N32				RT Mismatch signature predicted ¹ ²
62	C	m5Cm	05C	5,2′-O-dimethylcytidine
63	C	f5Cm	071C	5-formyl-2′-O-methylcytidine
64	C	f5C	71C	5-formylcytidine	Hypotonia / Floppy baby syndrome (NSUN3)[43] Lactic acidosis (NSUN3)[43] Leber hereditary optic neuropathy (NSUN3)[43]	NSUN3			N34 (mitocondria)
65	C	ho5C	50C	5-hydroxycytidine
66	C	hm5C	51C	5-hydroxymethylcytidine									osBS-Seq RIPseq (anti-5hmC)
67	C	m5C	5C	5-methylcytidine	Autosomal recessive Intellectual disability (NSUN2)[44, 45] Autistic features (NSUN2)[30] Breast cancer (NSUN2)[46] Cancer (NSUN2)[47] Dubowitz syndrome (NSUN2)[48] Intellectual disability syndromes (NSUN2)[44, 45, 48] Noonan-like syndrome (NSUN2)[49] Metabolism (NSUN2)[50] Hypotonia / Floppy baby syndrome (NSUN3)[43] Lactic acidosis (NSUN3)[43] Leber hereditary optic neuropathy (NSUN3)[43] Cri d…	NSUN2 (tRNA, ncRNA, mRNA) DNMT2 (tRNA) NSUN1 (rRNA) NSUN3 NSUN4 (mitoc rRNA) NSUN5 (rRNA pos 2782) NSUN6 WBSCR20 (rRNA pos 2782) hNOP2 (rRNA pos 4447) NOL1 (rRNA pos 4447) p120 (rRNA pos 4447) TRDMT1	TRM4 (NCL1) RCM1/ BMT3 (N2278) NOP2/BMT4 (N2870)		N34 N48 N49 N50 (NSUN2) C38 (DNMT2)				Bisulfite sequencing AZA-IP
68	C	m4Cm	04C	N4,2′-O-dimethylcytidine				RsmI RsmH
69	C	m4,4Cm	044C	N4,N4,2′-O-trimethylcytidine				RsmH					RT Mismatch signature predicted ³
70	C	m4,4C	44C	N4,N4-dimethylcytidine				RsmH					RT Mismatch signature predicted ³
71	C	ac4Cm	042C	N4-acetyl-2′-O-methylcytidine									RT Mismatch signature predicted ³
72	C	ac4C	42C	N4-acetylcytidine	Laminopathy (NAT10)[55] Hutchinson-Gilford progeria syndrome (NAT10)[56] Malignant disease (NAT10)[57]	NAT10 U13 (rRNA, pos 1842)	KRE33 (rRNA) RRA1 (rRNA) TAN1 (tRNA N12)						RT Mismatch signature predicted ³
73	C	m4C	4C	N4-methylcytidine				RsmH
74	C	C+	20C	agmatidine				TiaS (Archaea)					RT Mismatch signature predicted ³
75	C	C	C	cytidine
76	C	xC	?C	unknown modified cytidine
77	C	m1Gm	01G	1,2′-O-dimethylguanosine									RT Mismatch signature predicted ³
78	C	m1G	1G	1-methylguanosine	Diabetes II (TRMT10A)[58, 59] Intellectual disability (TRMT10A)[59, 60] X-linked intractable epilepsy (TRMT10C)[61] Neurodevelopmental regression (TRMT10C)[61] Multiple Respiratory Chain Deficiencies (TRMT10C)[62] Mitochondrial respiratory chain defects (TRMT10C)[62] Head and Neck cancer (TRMT5)[63] Multiple Respiratory Chain Deficiencies (TRMT5)[64] Colorectal cancer (RG9MTD2)[65]	TRMT5 (tRNA, pos 37) TRMT10A TRMT10B TRMT10C RG9MTD2 (tRNA, pos 9) RG9MTD1 RG9MTD3 SDR5C1	TRM5 (tRNA N37) TRM10 (tRNA N9)	AciRa RlmA(I) RlmA(II) Taw22 Trm5b TrmD	N37 N9				RT Mismatch signature predicted ¹ ²
79	C	Gm	0G	2′-O-methylguanosine	Non-syndromic X-linked mental retardation (FTSJ1)[13] Liver cancer (TARBP1)[66] Cancer (RNMTL1)[67]	TARBP1 FTSJ1 MRM1 RNMTL1	MRM1 NOP1 SPB1 TRM3 TRM7	RlmB TemH	N18			snRNA	RiboMethSeq
80	G	Gr(p)	00G	2′-O-ribosylguanosine (phosphate)
81	G	imG-14	4G	4-demethylwyosine		TYW1	TYW1						RT Mismatch signature predicted ³
82	G	yW-86	47G	7-aminocarboxypropyl-demethylwyosine			TYW2						RT Mismatch signature predicted ³
83	G	yW-72	347G	7-aminocarboxypropylwyosine		TYW3	TYW3						RT Mismatch signature predicted ³
84	G	yW-58	348G	7-aminocarboxypropylwyosine methyl ester			TYW4						RT Mismatch signature predicted ³
85	G	m7G	7G	7-methylguanosine	Intellectual disability (WDR4)[68] Primordial dwarfism (WDR4)[68] Cancer (WBSCR22/TRMT112)[69, 70] Inflammation (WBSCR22/TRMT112)[69] Neoplastic human lung pathology (WBSCR22/TRMT112)[69] Williams-Beuren (WBSCR22/TRMT112)[54]	WBSCR22/TRMT112 (rRNA) WDR4 METTL1 (tRNA)	BUD23-TRM112 (rRNA) TRM8/TRM82 (tRNA)	ArmA RlmKL RmtB RsmG Sgm TrmB	N46	5' cap
86	G	m2Gm	02G	N2,2′-O-dimethylguanosine									RT Mismatch signature predicted ³
87	G	m2,7Gm	027G	N2,7,2′-O-trimethylguanosine									RT Mismatch signature predicted ³
88	G	m2,7G	27G	N2,7-dimethylguanosine		TGS1	TGS1	Tgs2					RT Mismatch signature predicted ³
89	G	m2,2Gm	022G	N2,N2,2′-O-trimethylguanosine									RT Mismatch signature predicted ³
90	G	m2,2,7G	227G	N2,N2,7-trimethylguanosine		TGS1	TGS1					snoRNA capping	RT Mismatch signature predicted ³
91	G	m2,2G	22G	N2,N2-dimethylguanosine	Intellectual disability (TRMT1)[71]	TRMT1 TRMT1L (C1ORF25)	TRM1		N26				RT Mismatch signature predicted ¹ ²
92	G	m2G	2G	N2-methylguanosine	Prostate cancer (TRMT11)[72, 73]	TRMT11	TRM11	TRMT1	m2G10			snRNA	RT Mismatch signature predicted ²
93	G	G	G	guanosine
94	G	G+	G+	archaeosine
95	G	OHyW	34830G	hydroxywybutosine									RT Mismatch signature predicted ³
96	G	imG2	42G	isowyosine				Taw22					RT Mismatch signature predicted ³
97	G	OHyWy	3480G	methylated undermodified hydroxywybutosine									RT Mismatch signature predicted ³
98	G	mimG	342G	methylwyosine									RT Mismatch signature predicted ³
99	G	o2yW	34832G	peroxywybutosine									RT Mismatch signature predicted ³
100	G	OHyWx	3470G	undermodified hydroxywybutosine									RT Mismatch signature predicted ³
101	G	xG	?G	unknown modified guanosine
102	G	yW	3483G	wybutosine	Breast cancer (TRMT12)[74] Leukemia (TRMT12)[75]	TRMT12 (tRNA, pos 42)	TYW1 TRM12 (TYW2) TYW3 TYW4		yW42, yW37, yW14, Eukarya				RT Mismatch signature predicted ³
103	G	imG	34G	wyosine					Archaea Eukarya				RT Mismatch signature predicted ³
104	G	Q	10G	queuosine
105	G	oQ	102G	epoxyqueuosine
106	G	galQ	104G	galactosyl-queuosine
107	G	gluQ	105G	glutamyl-queuosine
108	G	preQ0	100G	7-cyano-7-deazaguanosine
109	G	preQ1	101G	7-aminomethyl-7-deazaguanosine
110	G	manQ	106G	mannosyl-queuosine
111	G	m1Am	01A	1,2′-O-dimethyladenosine					Eukarya				RT Mismatch signature predicted ³
112	G	m1Im	019A	1,2′-O-dimethylinosine									RT Mismatch signature predicted ³
113	G	m1A	1A	1-methyladenosine	Mitochondrial respiratory chain defects (TRMT10C)[62] Multiple Respiratory Chain Deficiencies (TRMT10C)[62] Neurodevelopmental regression (TRMT10C)[61] X-linked intractable epilepsy (TRMT10C)[61] Obesity (NML / Nucleomethyin)[76]	TRM6 TRMT10C TRM61A TRM61B Nucleomethyin (rRNA pos 1322) NML (rRNA pos 1322) hRRP8 (eNOSC complex) (rRNA pos 1322) SDR5C1 ALKBH1	TRM6 (GCD10) (tRNA) TRM61 (GCD14) (tRNA) RRP8/BMT1 (rRNA N645) BMT2 (rRNA N2142)		m1A58				RIP-Seq RT mismatch signature ¹ ²
114	G	m1I	19A	1-methylinosine									RT mismatch signature ²
115	G	m28A	28A	2,8-dimethyladenosine				Cfr
116	G	m2A	2A	2-methyladenosine					Archaea Bacteria		Bacteria
117	G	ms2io6A	2160A	2-methylthio-N6-(cis-hydroxyisopentenyl) adenosine					Eukarya
118	G	ms2hn6A	2163A	2-methylthio-N6-hydroxynorvalylcarbamoyladenosine					Archaea Bacteria
119	G	ms2i6A	2161A	2-methylthio-N6-isopentenyladenosine	Alzheimer’s disease (CDK5RAP1)[77] Breast cancer (CDK5RAP1)[78]	CDK5RAP1		MiaB	Bacteria				RT Mismatch signature predicted ²
120	G	ms2m6A	621A	2-methylthio-N6-methyladenosine					Bacteria
121	G	ms2t6A	2162A	2-methylthio-N6-threonylcarbamoyladenosine	Diabetes II (CDKAL1)[79-81]	CDKAL1		MtaB
122	A	Am	0A	2′-O-methyladenosine	Non-syndromic X-linked mental retardation (FTSJ1)[13]	FTSJ1 FTSJ2 FTSJ3	NOP1 NSR TRM13 TSR					snRNA snoRNA	RiboMethSeq
123	A	Im	09A	2′-O-methylinosine
124	A	Ar(p)	00A	2′-O-ribosyladenosine (phosphate)			RIT1
125	A	m8A	8A	8-methyladenosine				Cfr
126	A	m6Am	06A	N6,2′-O-dimethyladenosine								snRNA
127	A	m6,6Am	066A	N6,N6,2′-O-trimethyladenosine									RT Mismatch signature predicted ³
128	A	m6,6A	66A	N6,N6-dimethyladenosine		DIMT1L	DIM1						RT Mismatch signature predicted ¹
129	A	io6A	60A	N6-(cis-hydroxyisopentenyl)adenosine				MiaE
130	A	ac6A	64A	N6-acetyladenosine
131	A	f6A	67A	N6-formyladenosine	Breast cancer (FTO)[82] Cancer (FTO)[82][83] Coronary heart disease (FTO)[84, 85] Diabetes II (FTO)[86, 87] Developmental delay (FTO)[88] Intellectual disability/Mental retardation (FTO)[89-95] Leukemia (FTO)[96] Prostate cancer (FTO)[97] Obesity (FTO)[98] Zika virus (FTO)[99]	FTO
132	A	g6A	65A	N6-glycinylcarbamoyladenosine
133	A	hm6A	68A	N6-hydroxymethyladenosine	Breast cancer (FTO)[82] Cancer (FTO)[82][83] Coronary heart disease (FTO)[84, 85] Diabetes II (FTO)[86, 87] Developmental delay (FTO)[88] Intellectual disability/Mental retardation (FTO)[89-95] Leukemia (FTO)[96] Prostate cancer (FTO)[97] Obesity (FTO)[98] Zika virus (FTO)[99]	FTO
134	A	hn6A	63A	N6-hydroxynorvalylcarbamoyladenosine
135	A	i6A	61A	N6-isopentenyladenosine	Breast cancer (TRIT1)[100] Mitochondrial respiratory chain defects (TRIT1)[101]	MOD5 TRIT1	MOD5	MiaA Trit1	N37 bacteria eukarya				RT Mismatch signature predicted ²
136	A	m6t6A	662A	N6-methyl-N6-threonylcarbamoyladenosine		TRMO		Trmo					RT Mismatch signature predicted ³
137	A	m6A	6A	N6-methyladenosine	Acute myelogennous leukemia (WTAP)[102] Hypospadias (WTAP)[103] Breast cancer (FTO)[82] Cancer (FTO)[82][83] Coronary heart disease (FTO)[84, 85] Diabetes II (FTO)[86, 87] Developmental delay (FTO)[88] Intellectual disability/Mental retardation (FTO)[89-95] Leukemia (FTO)[96] Prostate cancer (FTO)[97] Obesity (FTO)[98] Zika virus (FTO)[99] Infertility (ALKBH5)[104] Major depressive disorder (ALKB…	ALKBH5 FTO Mettl14 Mettl3	IME4 RSMA	ErmAM ErmBC ErmC RlmF RlmJ RsmA TrmM	Archaea Bacteria			snRNA	RIP-Seq (anti-m6A)
138	A	t6A	62A	N6-threonylcarbamoyladenosine			SUA5	TsaD	N37				RT Mismatch signature predicted ²
139	A	A	A	adenosine
140	A	ct6A	69A	cyclic N6-threonylcarbamoyladenosine				TcdA
141	A	I	9A	inosine	Intellectual disability (ADAT3)[106] Strabismus (ADAT3)[106] Aicardi-Goutieres syndrome (ADAR1)[107] Chronic myeloid leukemia [ADAR1][108, 109] Deliberate self harm (ADAR1)[110] Esophageal squamous cell carcinoma (ADAR1)[111] Human hepatocellular carcinoma (ADAR1)[112] Metastatic melanoma (ADAR1)[113-115] ALS (ADAR2)[116-118] Alzheimer’s disease (ADAR2)[119] Glioblastoma multiforme (ADAR2)[120]	ADAT2-ADAT3 (tRNA) ADAT1 (tRNA) ADAR2 (mRNA, ncRNA) ADAR1 (mRNA, ncRNA)	TAD2-TAD3 (tRNA)		N34 (ADAT2-ADAT3) N37 (ADAT1)				RNA-Seq (A-to-G conversion) ice-Seq
142	A	xA	?A	unknown modified adenosine		THG1L	THG1
143	A	G-1	N/A	G in terminal 5'end		THG1L
	¹	RT mismatch/block predicted from Motorin et al., 2007
	2	RT mismatch/block predicted from Ryvkin et al., 2013
	3	Additional RT mismatch/block predicted based on disturbance of W-C base pairing

## Sheet: References
References
1. Armistead, J., et al., Mutation of a gene essential for ribosome biogenesis, EMG1, causes Bowen-Conradi syndrome. Am J Hum Genet, 2009. 84(6): p. 728-39.
2. Warda, A.S., et al., Effects of the Bowen-Conradi syndrome mutation in EMG1 on its nuclear import, stability and nucleolar recruitment. Hum Mol Genet, 2016.
3. Zeharia, A., et al., Acute infantile liver failure due to mutations in the TRMU gene. Am J Hum Genet, 2009. 85(3): p. 401-7.
4. Grover, Z., et al., Hepatic Copper Accumulation: A Novel Feature in Transient Infantile Liver Failure Due to TRMU Mutations? JIMD Rep, 2015. 21: p. 109-13.
5. Pathak, C., Y.K. Jaiswal, and M. Vinayak, Queuine promotes antioxidant defence system by activating cellular antioxidant enzyme activities in cancer. Biosci Rep, 2008. 28(2): p. 73-81.
6. Meng, F., et al., Biochemical evidence for a nuclear modifier allele (A10S) in TRMU (methylaminomethyl-2-thiouridylate-methyltransferase) related to mitochondrial tRNA modification in the phenotypic manifestation of deafness-associated 12S rRNA mutation. J Biol Chem, 2017.
7. Suzuki, T., et al., Taurine as a constituent of mitochondrial tRNAs: new insights into the functions of taurine and human mitochondrial diseases. EMBO J, 2002. 21(23): p. 6581-9.
8. Sasarman, F., et al., The 2-thiouridylase function of the human MTU1 (TRMU) enzyme is dispensable for mitochondrial translation. Hum Mol Genet, 2011. 20(23): p. 4634-43.
9. Meseguer, S., et al., The ROS-sensitive microRNA-9/9* controls the expression of mitochondrial tRNA-modifying enzymes and is involved in the molecular mechanism of MELAS syndrome. Hum Mol Genet, 2015. 24(1): p. 167-84.
10. Li, X. and M.X. Guan, A human mitochondrial GTP binding protein related to tRNA modification may modulate phenotypic expression of the deafness-associated mitochondrial 12S rRNA mutation. Mol Cell Biol, 2002. 22(21): p. 7701-11.
11. Gaignard, P., et al., Mitochondrial Infantile Liver Disease due to TRMU Gene Mutations: Three New Cases. JIMD Rep, 2013. 11: p. 117-23.
12. Uusimaa, J., et al., Reversible infantile respiratory chain deficiency is a unique, genetically heterogenous mitochondrial disease. J Med Genet, 2011. 48(10): p. 660-8.
13. Ramser, J., et al., A splice site mutation in the methyltransferase gene FTSJ1 in Xp11.23 is associated with non-syndromic mental retardation in a large Belgian family (MRX9). J Med Genet, 2004. 41(9): p. 679-83.
14. Ohshio, I., et al., ALKBH8 promotes bladder cancer growth and progression through regulating the expression of survivin. Biochem Biophys Res Commun, 2016. 477(3): p. 413-8.
15. Shimada, K., et al., A novel human AlkB homologue, ALKBH8, contributes to human bladder cancer progression. Cancer Res, 2009. 69(7): p. 3157-64.
16. Reinthaler, E.M., et al., Analysis of ELP4, SRPX2, and interacting genes in typical and atypical rolandic epilepsy. Epilepsia, 2014. 55(8): p. e89-93.
17. Delaunay, S., et al., Elp3 links tRNA modification to IRES-dependent translation of LEF1 to sustain metastasis in breast cancer. J Exp Med, 2016. 213(11): p. 2503-2523.
18. Anderson, S.L., et al., Familial dysautonomia is caused by mutations of the IKAP gene. Am J Hum Genet, 2001. 68(3): p. 753-8.
19. Slaugenhaupt, S.A., et al., Tissue-specific expression of a splicing mutation in the IKBKAP gene causes familial dysautonomia. Am J Hum Genet, 2001. 68(3): p. 598-605.
20. Cheishvili, D., et al., Dynamic changes in IKBKAP mRNA levels during crisis of familial dysautonomia patients. Auton Neurosci, 2014. 180: p. 59-65.
21. Liu, B., et al., Cardiac glycosides correct aberrant splicing of IKBKAP-encoded mRNA in familial dysautonomia derived cells by suppressing expression of SRSF3. FEBS J, 2013. 280(15): p. 3632-46.
22. Lefler, S., et al., Familial Dysautonomia (FD) Human Embryonic Stem Cell Derived PNS Neurons Reveal that Synaptic Vesicular and Neuronal Transport Genes Are Directly or Indirectly Affected by IKBKAP Downregulation. PLoS One, 2015. 10(10): p. e0138807.
23. Baruffini, E., et al., MTO1 mutations are associated with hypertrophic cardiomyopathy and lactic acidosis and cause respiratory chain deficiency in humans and yeast. Hum Mutat, 2013. 34(11): p. 1501-9.
24. Ghezzi, D., et al., Mutations of the mitochondrial-tRNA modifier MTO1 cause hypertrophic cardiomyopathy and lactic acidosis. Am J Hum Genet, 2012. 90(6): p. 1079-87.
25. Simpson, C.L., et al., Variants of the elongator protein 3 (ELP3) gene are associated with motor neuron degeneration. Hum Mol Genet, 2009. 18(3): p. 472-81.
26. Takeoka, S., et al., Amino-acid substitutions in the IKAP gene product significantly increase risk for bronchial asthma in children. J Hum Genet, 2001. 46(2): p. 57-63.
27. Begley, U., et al., A human tRNA methyltransferase 9-like protein prevents tumour growth by regulating LIN9 and HIF1-alpha. EMBO Mol Med, 2013. 5(3): p. 366-83.
28. Kopajtich, R., et al., Mutations in GTPBP3 cause a mitochondrial translation defect associated with hypertrophic cardiomyopathy, lactic acidosis, and encephalopathy. Am J Hum Genet, 2014. 95(6): p. 708-20.
29. Bykhovskaya, Y., et al., Phenotype of non-syndromic deafness associated with the mitochondrial A1555G mutation is modulated by mitochondrial RNA modifying enzymes MTO1 and GTPBP3. Mol Genet Metab, 2004. 83(3): p. 199-206.
30. Hussain, S. and Z.I. Bashir, The epitranscriptome in modulating spatiotemporal RNA translation in neuronal post-synaptic function. Front Cell Neurosci, 2015. 9: p. 420.
31. Alder, J.K., et al., Telomere phenotypes in females with heterozygous mutations in the dyskeratosis congenita 1 (DKC1) gene. Hum Mutat, 2013. 34(11): p. 1481-5.
32. Carrillo, J., et al., High resolution melting analysis for the identification of novel mutations in DKC1 and TERT genes in patients with dyskeratosis congenita. Blood Cells Mol Dis, 2012. 49(3-4): p. 140-6.
33. Thumati, N.R., et al., Severity of X-linked dyskeratosis congenita (DKCX) cellular defects is not directly related to dyskerin (DKC1) activity in ribosomal RNA biogenesis or mRNA translation. Hum Mutat, 2013. 34(12): p. 1698-707.
34. Bellodi, C., et al., Loss of function of the tumor suppressor DKC1 perturbs p27 translation control and contributes to pituitary tumorigenesis. Cancer Res, 2010. 70(14): p. 6026-35.
35. Sieron, P., et al., DKC1 overexpression associated with prostate cancer progression. Br J Cancer, 2009. 101(8): p. 1410-6.
36. Fernandez-Vizarra, E., et al., Nonsense mutation in pseudouridylate synthase 1 (PUS1) in two brothers affected by myopathy, lactic acidosis and sideroblastic anaemia (MLASA). J Med Genet, 2007. 44(3): p. 173-80.
37. Bykhovskaya, Y., et al., Missense mutation in pseudouridine synthase 1 (PUS1) causes mitochondrial myopathy and sideroblastic anemia (MLASA). Am J Hum Genet, 2004. 74(6): p. 1303-8.
38. Patton, J.R., et al., Mitochondrial myopathy and sideroblastic anemia (MLASA): missense mutation in the pseudouridine synthase 1 (PUS1) gene is associated with the loss of tRNA pseudouridylation. J Biol Chem, 2005. 280(20): p. 19823-8.
39. Zeharia, A., et al., Mitochondrial myopathy, sideroblastic anemia, and lactic acidosis: an autosomal recessive syndrome in Persian Jews caused by a mutation in the PUS1 gene. J Child Neurol, 2005. 20(5): p. 449-52.
40. Tebbutt, S.J., et al., Transcriptional Changes of Blood Eosinophils After Methacholine Inhalation Challenge in Asthmatics. Genomics Insights, 2012. 5: p. 1-12.
41. Gatza, M.L., et al., An integrated genomics approach identifies drivers of proliferation in luminal-subtype human breast cancer. Nat Genet, 2014. 46(10): p. 1051-9.
42. Tan, X.L., et al., Genetic variation predicting cisplatin cytotoxicity associated with overall survival in lung cancer patients receiving platinum-based chemotherapy. Clin Cancer Res, 2011. 17(17): p. 5801-11.
43. Nakano, S., et al., NSUN3 methylase initiates 5-formylcytidine biogenesis in human mitochondrial tRNA(Met). Nat Chem Biol, 2016. 12(7): p. 546-51.
44. Abbasi-Moheb, L., et al., Mutations in NSUN2 cause autosomal-recessive intellectual disability. Am J Hum Genet, 2012. 90(5): p. 847-55.
45. Khan, M.A., et al., Mutation in NSUN2, which encodes an RNA methyltransferase, causes autosomal-recessive intellectual disability. Am J Hum Genet, 2012. 90(5): p. 856-63.
46. Yi, J., et al., Overexpression of NSUN2 by DNA hypomethylation is associated with metastatic progression in human breast cancer. Oncotarget, 2016.
47. Okamoto, M., et al., Frequent increased gene copy number and high protein expression of tRNA (cytosine-5-)-methyltransferase (NSUN2) in human cancers. DNA Cell Biol, 2012. 31(5): p. 660-71.
48. Martinez, F.J., et al., Whole exome sequencing identifies a splicing mutation in NSUN2 as a cause of a Dubowitz-like syndrome. J Med Genet, 2012. 49(6): p. 380-5.
49. Fahiminiya, S., et al., Whole exome sequencing unravels disease-causing genes in consanguineous families in Qatar. Clin Genet, 2014. 86(2): p. 134-41.
50. Yan, M. and Q. Zhai, Sperm tsRNAs and acquired metabolic disorders. J Endocrinol, 2016. 230(3): p. F13-8.
51. Wu, Q., et al., Determination of the 'critical region' for cat-like cry of Cri-du-chat syndrome and analysis of candidate genes by quantitative PCR. Eur J Hum Genet, 2005. 13(4): p. 475-85.
52. Kullmann, K., et al., DNMT1 genetic polymorphisms affect breast cancer risk in the central European Caucasian population. Clin Epigenetics, 2013. 5(1): p. 7.
53. Franke, B., et al., An association study of 45 folate-related genes in spina bifida: Involvement of cubilin (CUBN) and tRNA aspartic acid methyltransferase 1 (TRDMT1). Birth Defects Res A Clin Mol Teratol, 2009. 85(3): p. 216-26.
54. Doll, A. and K.H. Grzeschik, Characterization of two novel genes, WBSCR20 and WBSCR22, deleted in Williams-Beuren syndrome. Cytogenet Cell Genet, 2001. 95(1-2): p. 20-7.
55. Robijns, J., et al., In silico synchronization reveals regulators of nuclear ruptures in lamin A/C deficient model cells. Sci Rep, 2016. 6: p. 30325.
56. Larrieu, D., et al., Chemical inhibition of NAT10 corrects defects of laminopathic cells. Science, 2014. 344(6183): p. 527-32.
57. Ma, R., et al., Up regulation of NAT10 promotes metastasis of hepatocellular carcinoma cells through epithelial-to-mesenchymal transition. Am J Transl Res, 2016. 8(10): p. 4215-4223.
58. Zung, A., et al., Homozygous deletion of TRMT10A as part of a contiguous gene deletion in a syndrome of failure to thrive, delayed puberty, intellectual disability and diabetes mellitus. Am J Med Genet A, 2015. 167A(12): p. 3167-73.
59. Yew, T.W., et al., tRNA methyltransferase homologue gene TRMT10A mutation in young adult-onset diabetes with intellectual disability, microcephaly and epilepsy. Diabet Med, 2016. 33(9): p. e21-5.
60. Igoillo-Esteve, M., et al., tRNA methyltransferase homolog gene TRMT10A mutation in young onset diabetes and primary microcephaly in humans. PLoS Genet, 2013. 9(10): p. e1003888.
61. Falk, M.J., et al., A novel HSD17B10 mutation impairing the activities of the mitochondrial RNase P complex causes X-linked intractable epilepsy and neurodevelopmental regression. RNA Biol, 2016. 13(5): p. 477-85.
62. Metodiev, M.D., et al., Recessive Mutations in TRMT10C Cause Defects in Mitochondrial RNA Processing and Multiple Respiratory Chain Deficiencies. Am J Hum Genet, 2016. 99(1): p. 246.
63. Sarin, L.P. and S.A. Leidel, Modify or die?--RNA modification defects in metazoans. RNA Biol, 2014. 11(12): p. 1555-67.
64. Powell, C.A., et al., TRMT5 Mutations Cause a Defect in Post-transcriptional Modification of Mitochondrial tRNA Associated with Multiple Respiratory-Chain Deficiencies. Am J Hum Genet, 2015. 97(2): p. 319-28.
65. Berg, M., et al., Distinct high resolution genome profiles of early onset and late onset colorectal cancer integrated with gene expression data identify candidate susceptibility loci. Mol Cancer, 2010. 9: p. 100.
66. Ye, J., et al., Expression of protein TARBP1 in human hepatocellular carcinoma and its prognostic significance. Int J Clin Exp Pathol, 2015. 8(8): p. 9089-96.
67. Xu, J., et al., The ATF/CREB site is the key element for transcription of the human RNA methyltransferase like 1(RNMTL1) gene, a newly discovered 17p13.3 gene. Cell Res, 2002. 12(3-4): p. 177-97.
68. Shaheen, R., et al., Mutation in WDR4 impairs tRNA m(7)G46 methylation and causes a distinct form of microcephalic primordial dwarfism. Genome Biol, 2015. 16: p. 210.
69. Jangani, M., et al., The methyltransferase WBSCR22/Merm1 enhances glucocorticoid receptor function and is regulated in lung inflammation and cancer. J Biol Chem, 2014. 289(13): p. 8931-46.
70. Nakazawa, Y., H. Arai, and N. Fujita, The novel metastasis promoter Merm1/Wbscr22 enhances tumor cell survival in the vasculature by suppressing Zac1/p53-dependent apoptosis. Cancer Res, 2011. 71(3): p. 1146-55.
71. Davarniya, B., et al., The Role of a Novel TRMT1 Gene Mutation and Rare GRM1 Gene Defect in Intellectual Disability in Two Azeri Families. PLoS One, 2015. 10(8): p. e0129631.
72. Kohli, M., et al., Germline predictors of androgen deprivation therapy response in advanced prostate cancer. Mayo Clin Proc, 2012. 87(3): p. 240-6.
73. Yu, Y.P., et al., Novel fusion transcripts associate with progressive prostate cancer. Am J Pathol, 2014. 184(10): p. 2840-9.
74. Rodriguez, V., et al., Chromosome 8 BAC array comparative genomic hybridization and expression analysis identify amplification and overexpression of TRMT12 in breast cancer. Genes Chromosomes Cancer, 2007. 46(7): p. 694-707.
75. Haverty, P.M., et al., High-resolution genomic and expression analyses of copy number alterations in breast tumors. Genes Chromosomes Cancer, 2008. 47(6): p. 530-42.
76. Oie, S., et al., Hepatic rRNA transcription regulates high-fat-diet-induced obesity. Cell Rep, 2014. 7(3): p. 807-20.
77. Reiter, V., et al., The CDK5 repressor CDK5RAP1 is a methylthiotransferase acting on nuclear and mitochondrial RNA. Nucleic Acids Res, 2012. 40(13): p. 6235-40.
78. Wang, H., et al., CDK5RAP1 deficiency induces cell cycle arrest and apoptosis in human breast cancer cell line by the ROS/JNK signaling pathway. Oncol Rep, 2015. 33(3): p. 1089-96.
79. Benrahma, H., et al., Association analysis of IGF2BP2, KCNJ11, and CDKAL1 polymorphisms with type 2 diabetes mellitus in a Moroccan population: a case-control study and meta-analysis. Biochem Genet, 2014. 52(9-10): p. 430-42.
80. Lasram, K., et al., Contribution of CDKAL1 rs7756992 and IGF2BP2 rs4402960 polymorphisms in type 2 diabetes, diabetic complications, obesity risk and hypertension in the Tunisian population. J Diabetes, 2015. 7(1): p. 102-13.
81. Locke, J.M., et al., A cautionary tale: the non-causal association between type 2 diabetes risk SNP, rs7756992, and levels of non-coding RNA, CDKAL1-v1. Diabetologia, 2015. 58(4): p. 745-8.
82. Tan, A., et al., Overexpression of the fat mass and obesity associated gene (FTO) in breast cancer and its clinical implications. Int J Clin Exp Pathol, 2015. 8(10): p. 13405-10.
83. Li, G., et al., Association between FTO gene polymorphism and cancer risk: evidence from 16,277 cases and 31,153 controls. Tumour Biol, 2012. 33(4): p. 1237-43.
84. Gustavsson, J., et al., FTO gene variation, macronutrient intake and coronary heart disease risk: a gene-diet interaction analysis. Eur J Nutr, 2016. 55(1): p. 247-55.
85. Gustavsson, J., et al., FTO genotype, physical activity, and coronary heart disease risk in Swedish men and women. Circ Cardiovasc Genet, 2014. 7(2): p. 171-7.
86. Xiao, S., et al., Correlation between polymorphism of FTO gene and type 2 diabetes mellitus in Uygur people from northwest China. Int J Clin Exp Med, 2015. 8(6): p. 9744-50.
87. Marcadenti, A., et al., Effects of FTO RS9939906 and MC4R RS17782313 on obesity, type 2 diabetes mellitus and blood pressure in patients with hypertension. Cardiovasc Diabetol, 2013. 12: p. 103.
88. Daoud, H., et al., Identification of a pathogenic FTO mutation by next-generation sequencing in a newborn with growth retardation and developmental delay. J Med Genet, 2016. 53(3): p. 200-7.
89. Dai, L., et al., Positive association of the FTSJ1 gene polymorphisms with nonsyndromic X-linked mental retardation in young Chinese male subjects. J Hum Genet, 2008. 53(7): p. 592-7.
90. Freude, K., et al., Mutations in the FTSJ1 gene coding for a novel S-adenosylmethionine-binding protein cause nonsyndromic X-linked mental retardation. Am J Hum Genet, 2004. 75(2): p. 305-9.
91. Froyen, G., et al., Loss of SLC38A5 and FTSJ1 at Xp11.23 in three brothers with non-syndromic mental retardation due to a microdeletion in an unstable genomic region. Hum Genet, 2007. 121(5): p. 539-47.
92. Gong, P., et al., Genetic variations in FTSJ1 influence cognitive ability in young males in the Chinese Han population. J Neurogenet, 2008. 22(4): p. 277-87.
93. Guy, M.P., et al., Defects in tRNA Anticodon Loop 2'-O-Methylation Are Implicated in Nonsyndromic X-Linked Intellectual Disability due to Mutations in FTSJ1. Hum Mutat, 2015. 36(12): p. 1176-87.
94. Honda, S., et al., Copy-number variations on the X chromosome in Japanese patients with mental retardation detected by array-based comparative genomic hybridization analysis. J Hum Genet, 2010. 55(9): p. 590-9.
95. Takano, K., et al., A loss-of-function mutation in the FTSJ1 gene causes nonsyndromic X-linked mental retardation in a Japanese family. Am J Med Genet B Neuropsychiatr Genet, 2008. 147B(4): p. 479-84.
96. Li, Z., et al., FTO Plays an Oncogenic Role in Acute Myeloid Leukemia as a N6-Methyladenosine RNA Demethylase. Cancer Cell, 2017. 31(1): p. 127-141.
97. Zhao, J., et al., Alterations of androgen receptor-regulated enhancer RNAs (eRNAs) contribute to enzalutamide resistance in castration-resistant prostate cancer. Oncotarget, 2016. 7(25): p. 38551-38565.
98. Zhong, T., et al., Anti-obesity effect of radix Angelica sinensis and candidate causative genes in transcriptome analyses of adipose tissues in high-fat diet-induced mice. Gene, 2017. 599: p. 92-98.
99. Lichinchi, G., et al., Dynamics of Human and Viral RNA Methylation during Zika Virus Infection. Cell Host Microbe, 2016. 20(5): p. 666-673.
100. Yue, Z., et al., Identification of breast cancer candidate genes using gene co-expression and protein-protein interaction information. Oncotarget, 2016. 7(24): p. 36092-36100.
101. Yarham, J.W., et al., Defective i6A37 modification of mitochondrial and cytosolic tRNAs results from pathogenic mutations in TRIT1 and its substrate tRNA. PLoS Genet, 2014. 10(6): p. e1004424.
102. Bansal, H., et al., WTAP is a novel oncogenic protein in acute myeloid leukemia. Leukemia, 2014. 28(5): p. 1171-4.
103. Utsch, B., et al., Exclusion of WTAP and HOXA13 as candidate genes for isolated hypospadias. Scand J Urol Nephrol, 2003. 37(6): p. 498-501.
104. Zheng, G., et al., ALKBH5 is a mammalian RNA demethylase that impacts RNA metabolism and mouse fertility. Mol Cell, 2013. 49(1): p. 18-29.
105. Du, T., et al., An association study of the m6A genes with major depressive disorder in Chinese Han population. J Affect Disord, 2015. 183: p. 279-86.
106. Alazami, A.M., et al., Mutation in ADAT3, encoding adenosine deaminase acting on transfer RNA, causes intellectual disability and strabismus. J Med Genet, 2013. 50(7): p. 425-30.
107. La Piana, R., et al., Bilateral striatal necrosis in two subjects with Aicardi-Goutieres syndrome due to mutations in ADAR1 (AGS6). Am J Med Genet A, 2014. 164A(3): p. 815-9.
108. Jiang, Q., et al., ADAR1 promotes malignant progenitor reprogramming in chronic myeloid leukemia. Proc Natl Acad Sci U S A, 2013. 110(3): p. 1041-6.
109. Steinman, R.A., et al., Deletion of the RNA-editing enzyme ADAR1 causes regression of established chronic myelogenous leukemia in mice. Int J Cancer, 2013. 132(8): p. 1741-50.
110. Simmons, M., J.H. Meador-Woodruff, and M.S. Sodhi, Increased cortical expression of an RNA editing enzyme occurs in major depressive suicide victims. Neuroreport, 2010. 21(15): p. 993-7.
111. Qiao, J.J., et al., ADAR1: a promising new biomarker for esophageal squamous cell carcinoma? Expert Rev Anticancer Ther, 2014. 14(8): p. 865-8.
112. Chan, T.H., et al., A disrupted RNA editing balance mediated by ADARs (Adenosine DeAminases that act on RNA) in human hepatocellular carcinoma. Gut, 2014. 63(5): p. 832-43.
113. Galore-Haskel, G., et al., A novel immune resistance mechanism of melanoma cells controlled by the ADAR1 enzyme. Oncotarget, 2015. 6(30): p. 28999-9015.
114. Shoshan, E., et al., Reduced adenosine-to-inosine miR-455-5p editing promotes melanoma growth and metastasis. Nat Cell Biol, 2015. 17(3): p. 311-21.
115. Nemlich, Y., et al., MicroRNA-mediated loss of ADAR1 in metastatic melanoma promotes tumor growth. J Clin Invest, 2013. 123(6): p. 2703-18.
116. Hideyama, T. and S. Kwak, When Does ALS Start? ADAR2-GluA2 Hypothesis for the Etiology of Sporadic ALS. Front Mol Neurosci, 2011. 4: p. 33.
117. Hideyama, T., et al., Profound downregulation of the RNA editing enzyme ADAR2 in ALS spinal motor neurons. Neurobiol Dis, 2012. 45(3): p. 1121-8.
118. Sasaki, S., T. Yamashita, and S. Kwak, Autophagy in spinal motor neurons of conditional ADAR2-knockout mice: An implication for a role of calcium in increased autophagy flux in ALS. Neurosci Lett, 2015. 598: p. 79-84.
119. Gaisler-Salomon, I., et al., Hippocampus-specific deficiency in RNA editing of GluA2 in Alzheimer's disease. Neurobiol Aging, 2014. 35(8): p. 1785-91.
120. Tomaselli, S., et al., Modulation of microRNA editing, expression and processing by ADAR2 deaminase in glioblastoma. Genome Biol, 2015. 16: p. 5.
